RESEARCH ARTICLE

# The combination of organic and inorganic fertilizers influence the weed growth, productivity and soil fertility of monsoon rice

Dibakar Ghosh<sup>1,2</sup>, Koushik Brahmachari<sup>2</sup>, Milan Skalický<sup>3</sup>, Dibakar Roy<sup>4</sup>, Anupam Das<sup>5</sup>, Sukamal Sarkar<sup>2,6</sup>, Debojyoti Moulick<sup>7,8</sup>, Marián Brestič<sup>3,9</sup>, Vaclav Hejnak<sup>3</sup>, Pavla Vachova<sup>3</sup>, Mohamed M. Hassan<sup>10</sup>, Akbar Hossain<sup>11\*</sup>

**1** ICAR–Indian Institute of Water Management, Bhubaneswar, India, **2** Department of Agronomy, Bidhan Chandra Krishi Viswavidyalaya, Mohanpur, Nadia, India, **3** Department of Botany and Plant Physiology, Faculty of Agrobiology, Food, and Natural Resources, Czech University of Life Sciences Prague, Prague, Czechia, **4** ICAR–Directorate of Weed Research, Jabalpur, India, **5** Department of Soil Science and Agricultural Chemistry, Bihar Agricultural University, Sabour, Bhagalpur, India, **6** Office of The Assistant Director of Agriculture, Bhagawangola-II Block, Directorate of Agriculture, Government of West Bengal, Murshidabad, India, **7** Plant Stress Biology and Metabolomics Laboratory, Assam University, Silchar, India, **8** Department of Environmental Science, University of Kalyani, Nadia, West Bengal, India, **9** Department of Plant Physiology, Slovak University of Agriculture, Nitra, Slovak, **10** Department of Biology, College of Science, Taif University, Taif, Saudi Arabia, **11** Bangladesh Wheat and Maize Research Institute, Nashipur, Dinajpur, Bangladesh

\* [akbarhossainwrc@gmail.com](mailto:akbarhossainwrc@gmail.com)

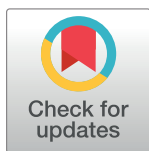

## OPEN ACCESS

**Citation:** Ghosh D, Brahmachari K, Skalický M, Roy D, Das A, Sarkar S, et al. (2022) The combination of organic and inorganic fertilizers influence the weed growth, productivity and soil fertility of monsoon rice. PLoS ONE 17(1): e0262586. <https://doi.org/10.1371/journal.pone.0262586>

**Editor:** Mohan Lal Dotaniya, Directorate of Rapeseed-Mustard Research, INDIA

**Received:** May 27, 2021

**Accepted:** December 29, 2021

**Published:** January 27, 2022

**Peer Review History:** PLOS recognizes the benefits of transparency in the peer review process; therefore, we enable the publication of all of the content of peer review and author responses alongside final, published articles. The editorial history of this article is available here: <https://doi.org/10.1371/journal.pone.0262586>

**Copyright:** © 2022 Ghosh et al. This is an open access article distributed under the terms of the [Creative Commons Attribution License](https://creativecommons.org/licenses/by/4.0/), which permits unrestricted use, distribution, and reproduction in any medium, provided the original author and source are credited.

**Data Availability Statement:** Data used in the manuscript are available in all Tables and Figures and a Supplementary S1 Table.

## Abstract

Synthetic fertilizer and herbicides encompass the largest share in nutrient and weed management on food grain crops that create serious environmental issues. Integrated nutrient and non-chemical weed management approaches may help to reduce the chemical load in the environment, maintaining higher weed control efficiency and yield. A field experiment was conducted for two consecutive monsoon seasons during 2015 and 2016 in farm fields to develop a profitable and sustainable rice production system through integrated nutrient and weed management practices. A varied combination of nutrients either alone or integrated with chemical and non-chemical weed management were tested on transplanted rice in a factorial randomized block design with three replications. The results showed that the integration of concentrated organic manures with chemical fertilizer effectively inhibited weed growth and nutrient removal. Integration of nutrient and weed management practices significantly enhanced 9% biomass growth, 10% yield of the rice crop along with 3–7% higher nutrient uptake. Brassicaceous seed meal (BSM) and neem cake also had some influence on weed suppression and economic return. Thus, the integrated nutrient and weed management practices in rice cultivation might be an effective way to achieve economic sustainability and efficient rice cultivation in eastern India. Shortages of farmyard manure and vermicompost could be supplemented by BSM and neem cake in the integrated module.

**Funding:** This study was supported by an S-grant from the Ministry of Education, Youth and Sports of the Czech Republic through Czech University of Life Sciences Prague, Kamýcka 129, 165 00, Prague, Czechia.

**Competing interests:** The authors have declared that no competing interests exist.

## 1 Introduction

Rice, wheat and maize are the mainstays of food security in the world. Rice is consumed as a staple food by more than 60% of the current world population [1] and more than 50% of the Indian population [2]. Globally rice is cultivated on 167.13 Mha of arable land with production and productivity of 782 Mt and 4.67 t·ha<sup>-1</sup>, respectively [3]. Rice is the most widely cultivated cereal crop, predominantly raised in south Asian countries like India, Bangladesh, Myanmar, China, and Thailand, either as an irrigated or rain-fed crop. In India, rice occupies about 44.5 Mha of cultivated land that produces 172.58 Mt with an average productivity of 3.87 t·ha<sup>-1</sup> [3]. India is the home of 1.32 billion people, so to ensure food security, India has to increase rice production at the rate of 3.75 Mt per year until 2050 [4]. Climatic suitability allows Indian farmers to grow rice in both the rainy and winter seasons of the year. Indian farmers mainly rely on nitrogenous fertilizers to increase food grain production, making India the second-largest nitrogen (N) consumer in the world [5]. Over the past 10 to 20 years, the data have shown a declining trend in rice productivity in many parts of India, despite higher nitrogenous fertilizer application [6] because of lower efficiency through greater runoff, leaching [7] and greenhouse gas emission [8] which leads to decreased partial factor productivity [9] and ultimately results in environmental pollution [10].

The main challenge for Indian farmers now is how to increase agricultural productivity while maintaining soil fertility for greater crop yields to meet the burgeoning population's need for food in the coming decades in an economically viable and ecologically acceptable way. Soil organic matter plays a central role in fertility and directly influences soil functions such as water retention [11]. Depletion of soil organic matter is the major cause for deteriorating soil health and loss of sustainability of the intensive rice-based cropping systems in India [12, 13]. The continuous addition of organic matter is necessary to maintain soil health because soil functions like a nutrient recycling system that can degrade toxic chemicals. The sole application of animal manure is not sufficient to meet the nutrient demands of rice because it contains relatively small amounts of nutrients and manure is not available in the huge amounts that would be necessary. The combined use of manure and inorganic fertilizer, however, may be a better choice for synchronization of nutrient release with crop demand. This would minimize nutrient losses in various pathways, and ensure sustainable productivity [14–16]. Integrated use of manure and inorganic fertilizer proved to be beneficial for maintaining soil nutrient balance, aggregation, moisture retention capacity and fertility [17–19]. This combination also favors soil carbon accumulation [20–22], correction of secondary and micronutrient deficiency and long-term enhancement of soil quality [23–25]. Increased crop yield and nutrient uptake of rice under conjoint use of organic manure with inorganic fertilizer have been reported by many researchers [9, 26, 27].

Weeds are one of the major harmful pests that severely affect growth and drastically limit crop yield [28, 29]. The yield loss due to weeds is mainly attributable to competition for water, nutrients, space and sunlight at the critical early growth stages of the crop [30–32]. Weed species present in the crop fields differ in their competitive ability for various inputs and crop yield loss is the manifestation of crop-weed competition offered by mixed weed flora present in the crop field [33]. Mahajan et al. [34] reported a 57% reduction in the yield of transplanted rice and 82% reduction in the yield of direct-seeded rice because of weed infestation. Agronomic practices such as poor fertilizer management strongly influence weed composition, diversity and density through altering crop and weed growth [35–37]. The weed community structure is strongly influenced by the source and dose of added nutrients like nitrogen [38] and partial substitution of organic manure for inorganic nitrogenous fertilizer increased weed management efficiency [39]. In earlier times, monsoon rain was sufficient for puddle-

transplanted rice cultivation. Thus, farmers in India did not practice any weed control measures since puddling followed by standing water in the field allowed rice to grow in weed-free conditions. But now the erratic distribution of rainfall in the monsoon season and frequent dry spells during the rice-growing period allows weeds to proliferate along with transplanted rice, resulting in greater crop-weed competition in the initial 30–45 days after transplantation (DAT). This necessitates efficient and cost-effective weed management strategies for puddle-transplanted rice. Currently, chemical weed management methods have become very popular for different crops including rice [29, 40–42]. However, the injudicious use of herbicides may cause serious environmental pollution, induce herbicide resistance in weeds, leave herbicide residues in the food chain, and have deleterious effects on soil microbial populations [43–46]. Integration of non-chemical weed management approaches helps to reduce herbicide load in the environment with greater weed control efficiency [47, 48].

The present study was undertaken to formulate a profitable and sustainable rice production strategy through integrated nutrient and weed management practices in subtropical eastern India. The objectives of this study were (i) to evaluate the effect of partial substitution of organic fertilizers and compost for inorganic fertilizers and sustainable weed management practices on growth, nutrient uptake, productivity and profitability of rice; (ii) to evaluate the effects of nutrient and weed management practices on weed growth under different treatment combinations; and (iii) to assess the changes in soil properties during the experimental period.

## 2. Materials and methods

### 2.1 Experimental site

The field experiment was conducted during two consecutive rainy seasons in 2015 and 2016 in farmers' fields in Uttar Chandamari village, Muratipur, Nadia, West Bengal, India (88°27' E longitude and 22°59' N latitude, with an elevation of 7.9 m above mean sea level). The region has a humid and subtropical climate, with a hot, dry spell from April to May and a hot, wet monsoon period from June to September, followed by cold, dry winter weather from November to March. During the experimental period, the mean maximum and minimum temperature; rainfall; maximum and minimum relative humidity; and sunshine hours were 32.9 and 27.5°C; 603 mm; 96.0 and 76.9% and 4.4 h in 2015 and 32.4 and 26.1; 893mm; 95.4 and 76.1% and 5.1 h in 2016, respectively. The soil of the experimental site is a clay loam with pH 7.39, electrical conductivity 0.29 dS·m<sup>-1</sup> and organic carbon content of 4.3 g·kg<sup>-1</sup>. The initially available nitrogen, phosphorus and potassium content were 175, 38.9 and 156 kg·ha<sup>-1</sup> respectively.

### 2.2 Experimental treatments

The experiment was laid out in a factorial randomized block design having two factors, nitrogen and weed management, with three replicates. The nutrient management practices included sole chemical fertilizer (100% nitrogen N, phosphorus P, and potassium K), integration of chemical fertilizer (75% N) with bulk organic farmyard manure (FYM) or the vermicompost and concentrated organic manures such as Brassicaceous seed meal (BSM) or neem cake for 25% of recommended N in rice. The P and K were applied through fertilizer. The weed management practices were: (1) no weeding, (2) herbicides (bispiribac-sodium 25 g·ha<sup>-1</sup> at 15 days after transplanting, DAT, followed by metsulfuron-methyl and chlorimuron ethyl [2 +2] g·ha<sup>-1</sup> at 30 DAT), and (3) integrated (bensulfuron methyl + pretilachlor [60+600] g·ha<sup>-1</sup> followed by mechanical weeding at 30 DAT). The recommended dose of fertilizer for the rice crop was 60-30-30 kg N- P<sub>2</sub>O<sub>5</sub>- K<sub>2</sub>O·ha<sup>-1</sup>. The nutrients were applied through urea (46% N), single superphosphate (16% P<sub>2</sub>O<sub>5</sub>), and muriate of potash (60% K<sub>2</sub>O). All P and K fertilizers along with organic manures (25% N) were applied as basal dose before transplanting. The N

fertilizer was applied in three splits i.e.  $\frac{1}{2}$  N before transplanting,  $\frac{1}{4}$  N at the tillering stage and remaining  $\frac{1}{4}$  N at the panicle initiation stage. A knapsack sprayer (16 litre capacity) with a flat fan nozzle was used for herbicide application and the spray volume was  $500 \text{ L} \cdot \text{ha}^{-1}$ .

### 2.3 Crop management

Field preparation was done by one ploughing, followed by flooding with water, and puddling was done by four passes with the power tiller. Twenty-two-day-old rice (cv. IET 4786) seedlings were transplanted on the 20<sup>th</sup> and 17<sup>th</sup> of July in both 2015 and 2016 seasons. Two seedlings per hill were transplanted at row-to-row and plant-to-plant distances of 20 and 15 cm, respectively. The individual plot size was  $7.2 \text{ m} \times 3.0 \text{ m}$  and a  $1.0 \text{ m}$  no-crop area was maintained between two adjacent plots. For controlling rice stem borer, 5% fipronil SC was applied to the rice crop at the tillering stage. The second and third rows on either side of each plot were used for plant biometric observations and destructive sampling, while for yield determination, the middle thirty crop rows were harvested manually on the 19<sup>th</sup> and 18<sup>th</sup> days of October 2015 and 2016, respectively.

### 2.4 Plant biometric measurements

In each plot, four permanent quadrats ( $60 \text{ cm} \times 60 \text{ cm}$ ) were earmarked for observation on weed density and dry biomass accumulation at 30 and 60 DAT. Weeds were cut at ground level from two quadrats, counted and cleaned with tap water followed by drying in the sun and a hot-air oven at  $65^\circ\text{C}$  for 72h and weighed. For plant height, five plants were selected from each plot and height was taken to the tip of the plant from ground level. Five hills were selected from the 2<sup>nd</sup> and 3<sup>rd</sup> rows of either side and cut at ground level then dried in the sun and in a hot-air oven at  $65^\circ\text{C}$  for 72h and weighed for determination of accumulated plant dry biomass. The crop growth rate was defined as an increase in the biomass of plants per unit area per unit change of time [49].

$$\text{CGR} (\text{g} \cdot \text{m}^{-2} \text{day}^{-1}) = \frac{W_2 - W_1}{t_2 - t_1}$$

where,  $W_1$  = plant dry biomass per unit area at  $\text{timet}_1$ , and  $W_2$  = plant dry biomass per unit area at  $\text{timet}_2$ .

Punching a core of known area was used for leaf area index (LAI) calculations. The dry weight of the known area was recorded and the area-weight relationship was calculated. The leaf area of each treatment was worked out using this relationship. The LAI was calculated from the formula given by Watson [50]:

$$\text{LAI} = \frac{\text{Area of total number of leaves (cm}^2\text{)}}{\text{Ground area from where leaf samples were collected (cm}^2\text{)}}$$

At the physiological maturity of the crop, the number of panicles was measured from ten hills of the net plot area and converted to a  $\text{per m}^2$  basis. Twenty panicles from the 2<sup>nd</sup> and 3<sup>rd</sup> rows of either side were collected, dried to 14% moisture content then weighed to get panicle weight in grams. For the determination of rice grain yield, the crop was harvested manually at ground level from the net plot area. Grains were threshed, dried to 14% and weighed. The weight of grains was converted to  $\text{t} \cdot \text{ha}^{-1}$ .

### 2.5 Soil and plant analyses

Replicate soil samples at 0-15 cm depth were collected after the harvest of the second rice crop from all treatments. The soil samples were dried in air, passed through a 2 mm sieve, and

stored in a polybag for chemical analysis. Soil pH and electrical conductivity (EC) at a soil: water ratio of 1:2.5 was determined by standard methods [51]. The organic carbon content of the soils was determined using the wet oxidation method [52]. The available N and P in soil was determined by the alkaline permanganate method [53] and the ascorbic acid reduced blue color method [54]. Available K was measured by flame photometry using neutral 1N ammonium acetate extractant as described by Jackson [51].

The plant samples from each treatment were collected, oven-dried, and ground for analyzing total N, P and K. For plant N estimation, 1 g of ground plant sample was placed into a Kjeldahl tube and 5 mL of concentrated  $H_2SO_4$ , 1 g of digestion mixture (potassium sulfate: copper sulfate: selenium powder, 100:10:1) was added and digestion was carried out for 3 h until a white or colorless solution was obtained. N was estimated by the micro-Kjeldahl method. For the determination of P and K content, plant material was digested in tri-acid ( $HNO_3$ :  $H_2SO_4$ :  $HClO_4$  = 10:1:4) [51] and estimated by spectrophotometer and flame photometer, respectively. The total N, P and K content of organic manures was also determined for each year before application (S1 Table).

## 2.6 Data analysis

Due to high variance, the actual weed density (X) data were transformed [ $\sqrt{(X + 0.5)}$ ] before statistical analysis, whereas original weed density is presented in the manuscript. Data were subjected to analysis of variance using GenStat software. Treatment means were compared by Tukey's Honestly Significant Difference at the 5% level of significance. The effect of years was estimated to be homogeneous and consequently, variance over years was pooled with the experimental error variance. Excel software was used for drawing graphs and figures.

## 3. Results

### 3.1 Weed growth and nutrient uptake by weeds

The weed flora observed at the experimental site were *Scirpus juncoides* Roxb, *Scirpus maritimus* L. *Eleocharis congesta* D. Don, *Cyperus difformis* L., *Cyperus rotundus* L., *Leersia hexandra* Swartz, *Ludwigia octovalvis* (Jacq.) Raven and *Ammannia baccifera* L. The weed density, dry matter accumulation and nutrient uptake by weeds at different crop growth stages were influenced by year, nutrient and weed management practices as described in Table 1. The density of weeds at the early crop growth stage (tillering) varied significantly ( $p < 0.001$ ) with year, nutrient level and weed management practices, but the effects of the year on weed density at the later crop growth stage (panicle initiation) was not significant ( $p \geq 0.05$ ). N supplementation through organic manures had no significant effect on dry matter accumulation by weeds at tillering, but significantly ( $p < 0.001$ ) influenced weed biomass at later growth stages. The addition of concentrated organic green manures (BSM and neem cake) were superior to bulky organic manures (vermicompost and FYM) and to sole chemical fertilizer in reducing weed density at the crop growth stages and weed biomass at the panicle initiation stage. The weed management approaches viz., chemical (bispiribac-Na followed by metsulfuron-methyl + chlorimuron ethyl) and integrated (bensulfuron methyl + pretilachlor followed by hoeing) significantly reduced the weed density and biomass compared to non-weeded. The performances of weed management practices were statistically similar except for weed density at the panicle initiation stage.

The uptake of plant macronutrients (N, P, K) by weeds at the panicle initiation stage of rice was significantly ( $p < 0.05$ ) influenced by year, nutrient, weed management and their interaction (nutrient  $\times$  weed) (Table 3). The yearly effect of weed management was also statistically



Table 1. Effect of different nutrient sources and weed management practices on weed growth and nutrient uptake.

| Treatment                             | Weed density (no·m <sup>-2</sup> ) |        | Weed dry weight (g·m <sup>-2</sup> ) |        | Nutrient uptake (kg·ha <sup>-1</sup> ) by weeds at 60 DAT |       |       |
|---------------------------------------|------------------------------------|--------|--------------------------------------|--------|-----------------------------------------------------------|-------|-------|
|                                       | 30 DAT                             | 60 DAT | 30 DAT                               | 60 DAT | N                                                         | P     | K     |
| <b>Year</b>                           |                                    |        |                                      |        |                                                           |       |       |
| Year 1                                | 125a                               | 95a    | 8.52a                                | 42.3a  | 9.04a                                                     | 0.65a | 1.00a |
| Year 2                                | 88b                                | 88a    | 6.83b                                | 38.9b  | 8.34b                                                     | 0.60b | 0.93b |
| <b>Nutrient management</b>            |                                    |        |                                      |        |                                                           |       |       |
| Fert <sub>100</sub>                   | 111ab                              | 103a   | 7.74a                                | 44.4a  | 9.50a                                                     | 0.68a | 1.06a |
| Fert <sub>75</sub> -VC <sub>25</sub>  | 124a                               | 96a    | 7.45a                                | 47.1a  | 10.21a                                                    | 0.73a | 1.12a |
| Fert <sub>75</sub> -FYM <sub>25</sub> | 116a                               | 106a   | 8.24a                                | 45.4a  | 9.75a                                                     | 0.70a | 1.08a |
| Fert <sub>75</sub> -BSM <sub>25</sub> | 87c                                | 77b    | 7.45a                                | 33.0b  | 7.05b                                                     | 0.51b | 0.78b |
| Fert <sub>75</sub> -NC <sub>25</sub>  | 93bc                               | 78b    | 7.50a                                | 32.9b  | 6.93b                                                     | 0.50b | 0.78b |
| <b>Weed management</b>                |                                    |        |                                      |        |                                                           |       |       |
| Weedy                                 | 293a                               | 287a   | 15.73a                               | 102.8a | 22.11a                                                    | 1.59a | 2.47a |
| Herbicide                             | 51b                                | 39b    | 3.99b                                | 10.6b  | 2.20b                                                     | 0.16b | 0.24b |
| Integrated                            | 43b                                | 31c    | 3.30b                                | 8.3b   | 1.75b                                                     | 0.12b | 0.19b |
| <b>Source of variation</b>            |                                    |        |                                      |        |                                                           |       |       |
| Year                                  | ***                                | ns     | ***                                  | **     | **                                                        | **    | *     |
| NM                                    | ***                                | ***    | ns                                   | ***    | ***                                                       | ***   | ***   |
| WM                                    | ***                                | ***    | *****                                | ***    | ***                                                       | ***   | ***   |
| Year × NM                             | ns                                 | ns     | ns                                   | ns     | ns                                                        | ns    | ns    |
| Year × WM                             | ns                                 | ns     | ns                                   | ns     | *                                                         | ns    | ns    |
| NM × WM                               | ns                                 | ***    | ns                                   | ***    | ***                                                       | ***   | ***   |
| Year × NM × WM                        | ns                                 | ns     | ns                                   | ns     | ns                                                        | ns    | ns    |

NM, nutrient management; WM, weed Management; N, nitrogen; P, phosphorus; K, potassium; VC, vermicompost; FYM, farmyard manure; BSM, brassicaceous seed meal; NC, neem cake; Fert<sub>100</sub>, full dose of N,P and K through fertilizer; Fert<sub>75</sub>-VC<sub>25</sub>, 75% of N and 100% of P and K through fertilizer with 25% N through VC; Fert<sub>75</sub>-FYM<sub>25</sub>, 75% of N and 100% of P and K through fertilizer with 25% N through FYM; Fert<sub>75</sub>-BSM<sub>25</sub>, 75% of N and 100% of P and K through fertilizer with 25% N through BSM; Fert<sub>75</sub>-NC<sub>25</sub>, 75% of N and 100% of P and K through fertilizer with 25% N through NC; Weedy, no weeding; herbicide, bispyribac-sodium 25 g/ha at 15 DAT *f*bmetsulfuron methyl + chlorimuron ethyl (2+2) g/ha at 30 DAT; Integrated, bensulfuron methyl + pretilachlor (60+600) g/ha at 5 DAT *f*b MW at 30 DAT; DAT, days after transplanting; Within year, nutrient and weed management, numbers followed by different letter indicate significant differences at  $p \leq 0.05$  (otherwise statistically at par); ns, non-significant ( $p > 0.05$ )

\*, \*\* and \*\*\* indicate significance at  $p < 0.05$ , 0.01 and 0.001, respectively.

<https://doi.org/10.1371/journal.pone.0262586.t001>

( $p < 0.05$ ) influenced by the N uptake of weed flora. Similar to weed density and biomass accumulation by weeds, the N, P and K uptake by weed flora was also restricted with the addition of BSM and neem cake as 25% of recommended N source of transplanted rice. The lowest values of N uptake by weeds (6.93 kg/ha) was observed with neem cake application. Weed management methods significantly restricted ( $p < 0.001$ ) the nutrient uptake by weeds. The chemical and integrated weed management methods curtailed the NPK uptake by 90 and 92%, respectively, and their performance was statistically similar ( $p \geq 0.05$ ).

### 3.2 Crop growth, yield attributes and grain yield

The crop growth parameters (height, biomass accumulation, LAI and CGR), panicle number, panicle weight and grain yield of rice by year, nutrient application and weed management practice are depicted in Table 2. Except for plant height, the variation in other growth parameters was not statistically significant ( $p \geq 0.05$ ) with year. Nutrient management practices influenced ( $p < 0.01$ ) biomass accumulation by rice plants, but its effect on plant height, LAI and CGR at 90 DAT was not significant ( $p \geq 0.05$ ). The addition of N (25%) through BSM was

Table 2. Effect of different nutrient sources and weed management practices on plant growth, yield attributes, and yield.

| Treatment                             | Plant height (cm) at 90 DAT | Biomass (g·m <sup>-2</sup> ) at 90 DAT | LAI at 90 DAT | CGR (g·m <sup>-2</sup> ·day <sup>-1</sup> ) at 60–90 DAT | Panicles m <sup>-2</sup> | Panicle weight (g) | Grain yield (t·ha <sup>-1</sup> ) |
|---------------------------------------|-----------------------------|----------------------------------------|---------------|----------------------------------------------------------|--------------------------|--------------------|-----------------------------------|
| <b>Year</b>                           |                             |                                        |               |                                                          |                          |                    |                                   |
| Year 1                                | 106b                        | 891a                                   | 2.37a         | 15.3a                                                    | 379a                     | 2.44a              | 5.14a                             |
| Year 2                                | 108a                        | 913a                                   | 2.43a         | 15.4a                                                    | 392a                     | 2.55a              | 5.19a                             |
| <b>Nutrient management</b>            |                             |                                        |               |                                                          |                          |                    |                                   |
| Fert <sub>100</sub>                   | 107a                        | 871b                                   | 2.41a         | 14.8a                                                    | 365b                     | 2.18b              | 4.84b                             |
| Fert <sub>75</sub> -VC <sub>25</sub>  | 106a                        | 886b                                   | 2.4a          | 15.3a                                                    | 371ab                    | 2.49a              | 5.16ab                            |
| Fert <sub>75</sub> -FYM <sub>25</sub> | 107a                        | 899ab                                  | 2.42a         | 15.6a                                                    | 380ab                    | 2.63a              | 5.21ab                            |
| Fert <sub>75</sub> -BSM <sub>25</sub> | 109a                        | 953a                                   | 2.36a         | 16.4a                                                    | 410a                     | 2.59a              | 5.55a                             |
| Fert <sub>75</sub> -NC <sub>25</sub>  | 107a                        | 899ab                                  | 2.42a         | 14.6a                                                    | 401ab                    | 2.58a              | 5.13ab                            |
| <b>Weed management</b>                |                             |                                        |               |                                                          |                          |                    |                                   |
| Weedy                                 | 104c                        | 806c                                   | 2.22b         | 13.7c                                                    | 342b                     | 2.22c              | 4.51c                             |
| Herbicide                             | 108b                        | 916b                                   | 2.49a         | 15.2b                                                    | 399a                     | 2.53b              | 5.23b                             |
| Integrated                            | 110a                        | 989a                                   | 2.5a          | 17.2a                                                    | 415a                     | 2.74a              | 5.77a                             |
| <b>Source of variation</b>            |                             |                                        |               |                                                          |                          |                    |                                   |
| Year                                  | **                          | ns                                     | ns            | ns                                                       | ns                       | ns                 | ns                                |
| NM                                    | ns                          | **                                     | ns            | ns                                                       | *                        | ***                | *                                 |
| WM                                    | ***                         | ***                                    | ***           | ***                                                      | ***                      | ***                | ***                               |
| Year × NM                             | ns                          | ns                                     | ns            | ns                                                       | ns                       | ns                 | ns                                |
| Year × WM                             | ns                          | ns                                     | ns            | ns                                                       | ns                       | ns                 | ns                                |
| NM × WM                               | ns                          | ns                                     | ns            | ns                                                       | ns                       | ns                 | ns                                |
| Year × NM × WM                        | ns                          | ns                                     | ns            | ns                                                       | ns                       | ns                 | ns                                |

NM, nutrient management; WM, weed management; N, nitrogen; P, phosphorus; K, potassium; VC, vermicompost; FYM, farmyard manure; BSM, brassicaceous seed meal; NC, neem cake; Fert<sub>100</sub>, full dose of N,P and K through fertilizer; Fert<sub>75</sub>-VC<sub>25</sub>, 75% of N and 100% of P and K through fertilizer with 25% N through VC; Fert<sub>75</sub>-FYM<sub>25</sub>, 75% of N and 100% of P and K through fertilizer with 25% N through FYM; Fert<sub>75</sub>-BSM<sub>25</sub>, 75% of N and 100% of P and K through fertilizer with 25% N through BSM; Fert<sub>75</sub>-NC<sub>25</sub>, 75% of N and 100% of P and K through fertilizer with 25% N through NC; Weedy, no weeding; Herbicide, bispyribac-sodium 25 g/ha at 15 DAT *fb* metsulfuron methyl + chlorimuron ethyl (2+2) g/ha at 30 DAT; Integrated, bensulfuron methyl + pretilachlor (60+600) g/ha at 5 DAT *fb* MW at 30 DAT; DAT, Days after transplanting; Within year, nutrient and weed management, numbers followed by different letter indicate significant differences at  $p \leq 0.05$  (otherwise statistically at par); ns, non-significant ( $p > 0.05$ )

\*, \*\* and \*\*\* indicate significant at  $p < 0.05$ , 0.01 and 0.001, respectively.

<https://doi.org/10.1371/journal.pone.0262586.t002>

statistically superior to N addition through vermicompost or sole chemical fertilizer for biomass accumulation by rice plants. The supplementation of N through BSM enhanced the rice biomass accumulation by 9% over sole chemical fertilization. The performance of weed management practices on crop growth parameters was highly significant ( $p < 0.001$ ). Height, biomass accumulation and growth rate of rice plants were statistically superior with the inclusion of hoeing at 30 DAT following pre-emergence herbicide (bensulfuron methyl + pretilachlor) over bispyribac-Na followed by metsulfuron-methyl + chlorimuron ethyl. Both weed management approaches were similar for LAI at 90 DAT.

The number of panicles, panicle weight and grain yield of rice were not influenced by year ( $p \geq 0.05$ ); however, the effect of nutrient and weed management practices was significant ( $p < 0.01$ ) (Table 2). The nutrients supplied by organic manures gave higher values for the number of panicles, panicle weight and grain yield of rice. The addition of BSM increased the number of panicles/m<sup>2</sup> by 12%. The N supplementation through organic manures enhanced the rice yield over sole chemical fertilizer. The addition of N through BSM was statistically superior ( $p < 0.05$ ) to sole chemical fertilizer, however, the performance of vermicompost,

Table 3. Effect of different nutrient sources and weed management practices on nutrient uptake by rice plants at harvest.

| Treatment                             | Nutrient uptake (kg·ha <sup>-1</sup> ) by grain |       |       | Nutrient uptake (kg·ha <sup>-1</sup> ) by straw |        |         |
|---------------------------------------|-------------------------------------------------|-------|-------|-------------------------------------------------|--------|---------|
|                                       | N                                               | P     | K     | N                                               | P      | K       |
| <b>Year</b>                           |                                                 |       |       |                                                 |        |         |
| Year 1                                | 83.6a                                           | 10.8b | 19.7a | 64.0a                                           | 13.3b  | 100.2a  |
| Year 2                                | 84.8a                                           | 11.4a | 19.7a | 96.5a                                           | 14.2a  | 107.3b  |
| <b>Nutrient management</b>            |                                                 |       |       |                                                 |        |         |
| Fert <sub>100</sub>                   | 81.0b                                           | 11.2a | 15.8c | 96.8a                                           | 14.1ab | 111.8a  |
| Fert <sub>75</sub> -VC <sub>25</sub>  | 83.3ab                                          | 11.6a | 18.3b | 98.0a                                           | 14.5a  | 98.1b   |
| Fert <sub>75</sub> -FYM <sub>25</sub> | 90.1a                                           | 11.6a | 21.9a | 97.5a                                           | 13.4ab | 10.2a   |
| Fert <sub>75</sub> -BSM <sub>25</sub> | 89.3a                                           | 11.3a | 21.7a | 91.4a                                           | 13.8ab | 104.0ab |
| Fert <sub>75</sub> -NC <sub>25</sub>  | 77.2b                                           | 9.7b  | 20.9a | 92.6a                                           | 12.9b  | 96.7b   |
| <b>Weed management</b>                |                                                 |       |       |                                                 |        |         |
| Weedy                                 | 73.9c                                           | 9.8c  | 16.9c | 90.4b                                           | 13.3b  | 91.9b   |
| Herbicide                             | 86.0b                                           | 11.2b | 18.2b | 95.0ab                                          | 13.4b  | 107.8a  |
| Integrated                            | 92.7a                                           | 12.3a | 24.0a | 100.4a                                          | 14.4a  | 111.5a  |
| <b>Source of variation</b>            |                                                 |       |       |                                                 |        |         |
| Year                                  | ns                                              | *     | ns    | ns                                              | ***    | **      |
| NM                                    | ***                                             | ***   | ***   | ns                                              | **     | ***     |
| WM                                    | ***                                             | ***   | ***   | ***                                             | **     | ***     |
| Year × NM                             | ns                                              | ns    | ns    | ns                                              | **     | ns      |
| Year × WM                             | ns                                              | *     | ns    | ns                                              | ns     | ns      |
| NM × WM                               | ***                                             | ***   | ***   | ***                                             | **     | ***     |
| Year × NM × WM                        | ns                                              | ns    | ns    | ns                                              | ns     | ns      |

NM, nutrient management; WM, weed management; N, nitrogen; P, phosphorus; K, potassium; VC, vermicompost; FYM, farmyard manure; BSM, brassicaceous seed meal; NC, neem cake; Fert<sub>100</sub>, full dose of N,P and K through fertilizer; Fert<sub>75</sub>-VC<sub>25</sub>, 75% of N and 100% of P and K through fertilizer with 25% N through VC; Fert<sub>75</sub>-FYM<sub>25</sub>, 75% of N and 100% of P and K through fertilizer with 25% N through FYM; Fert<sub>75</sub>-BSM<sub>25</sub>, 75% of N and 100% of P and K through fertilizer with 25% N through BSM; Fert<sub>75</sub>-NC<sub>25</sub>, 75% of N and 100% of P and K through fertilizer with 25% N through NC; Weedy, no weeding; Herbicide, bispyribac-sodium 25 g/ha at 15 DAT fb metsulfuron methyl + chlorimuron ethyl (2+2) g/ha at 30 DAT; Integrated, bensulfuron methyl + pretilachlor (60+600) g/ha at 5 DAT fb MW at 30 DAT; DAT, days after transplanting; Within year, nutrient and weed management, numbers followed by different letter indicate significant differences at  $p \leq 0.05$  (otherwise statistically at par); ns, non-significant ( $p > 0.05$ )

\*, \*\* and \*\*\* indicate significant at  $p < 0.05$ , 0.01 and 0.001, respectively.

<https://doi.org/10.1371/journal.pone.0262586.t003>

FYM and neem cake was at par ( $p \geq 0.05$ ) with sole chemical fertilization. Among the weed management practices, the performance chemical and integrated approach were similar for the number of panicles but significantly different in respect to panicle weight and rice grain yield. The addition of hoeing following pre-emergence herbicide (integrated) enhanced the panicle weight and rice grain yield by 8 and 10%, respectively over the chemical approach.

### 3.3 Nutrient uptake by rice grain and straw

The N, P and K have been taken up by rice grains and straw depended upon the nutrient content and yield of rice. The N, P and K uptake by grain and straw as influenced by year, nutrient and weed management practices are depicted in Table 3. The effect of year on N uptake by rice grains and straw and K uptake by rice grains was not significant ( $p \geq 0.05$ ). The effect of nutrient and weed management practices and their interaction was significant on nutrient uptake by rice grain and straw (nutrient × weed). Grain N uptake ranged from 77.2 to 90.1 kgN·ha<sup>-1</sup> and maximum grain N uptake was recorded for plots with added FYM, closely followed by N addition through BSM. The straw N uptake was statistically at par for all nutrient management



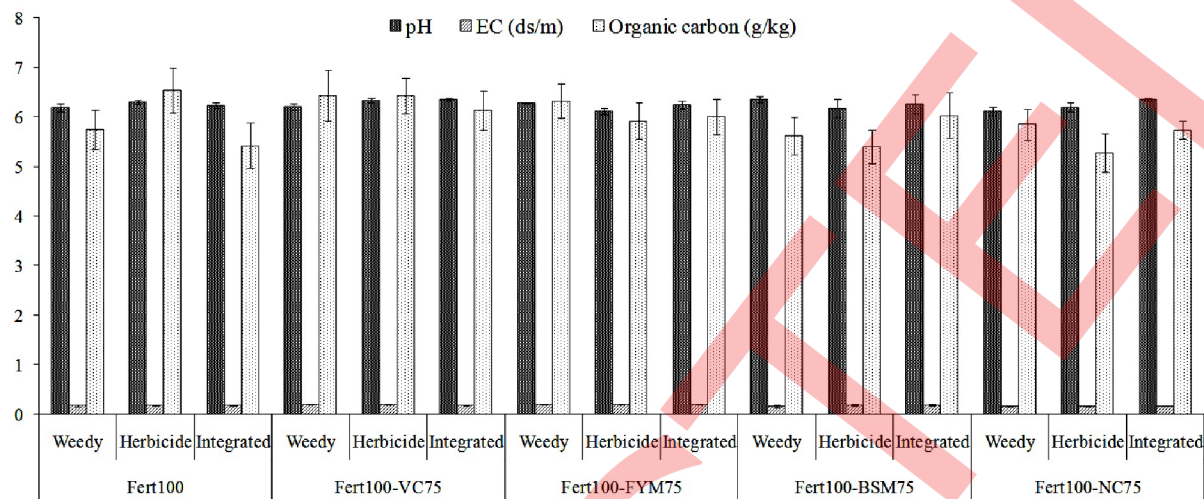

**Fig 1. Effect of fertilizer and weed treatment combinations on post-harvest soil pH, electrical conductivity (EC) and organic carbon content.**

<https://doi.org/10.1371/journal.pone.0262586.g001>

treatments and ranged from 91.4 to 98.0 kg N·ha<sup>-1</sup>, though a higher but non-significant straw N uptake was observed with the addition of bulky organic manures at 25% N supplementation. The grain and straw P uptake followed a similar trend with grain P uptake ranging from 9.7 to 11.6 kg·ha<sup>-1</sup>. The lowest grain P uptake was recorded from plots received neem cake for N supplementation. The straw P uptake ranged from 12.9 to 14.5 kg·ha<sup>-1</sup> and the maximum straw P uptake was observed on plots with vermicompost added. N supplementation through FYM, BSM and neem cake was statistically superior to chemical fertilizer and N addition through vermicompost in respect to uptake by rice grain. The lowest K uptake (96.7 kg·ha<sup>-1</sup>) by rice straw was observed with N supplementation through neem cake.

Both chemical and integrated weed management practices significantly reduced nutrient uptake by weeds and improved nutrient uptake by rice grain and straw. The grain and straw N, P and K uptake were significantly higher with the inclusion of hoeing at 30 DAT following bensulfuron methyl + pretilachlor over bispyribac-Na followed by metsulfuron-methyl + chlorimuron ethyl. The straw N and K uptake under the chemical and integrated weed management approach were statistically at par ( $p \geq 0.05$ ). The integrated weed management approach enhanced grain N, P and K uptake by 8, 10 and 32%, respectively, over the sole chemical approach. The degree of N, P and K uptake enhancement by rice straw with integrated weed management approach was 6, 7 and 3%, respectively, over sole chemical fertilization.

### 3.4 Changes in soil properties

The integrated nutrient and weed management practices and their interaction had no statistically ( $p \geq 0.05$ ) a significant impact on post-harvest soil properties like pH, EC, organic carbon and available macronutrient contents (Figs 1 and 2). Soil pH varied from 6.12 to 6.36, and EC varied from 0.17 to 0.21 dS·m<sup>-1</sup> which means that the soil was slightly acidic and non-saline. Soil organic carbon ranged from 5.4 to 6.4 g·kg<sup>-1</sup>, indicating that short-term organic manure addition was unable to produce a significant change in soil organic carbon content among the different treatments. In post-harvest soil, the available N, P and K ranged from 203–246, 33.2–45.5 and 171–189 kg·ha<sup>-1</sup>, respectively. Organic manure addition at 25% N supplementation resulted in a non-significant ( $p \geq 0.05$ ) increase in available nitrogen content over chemically

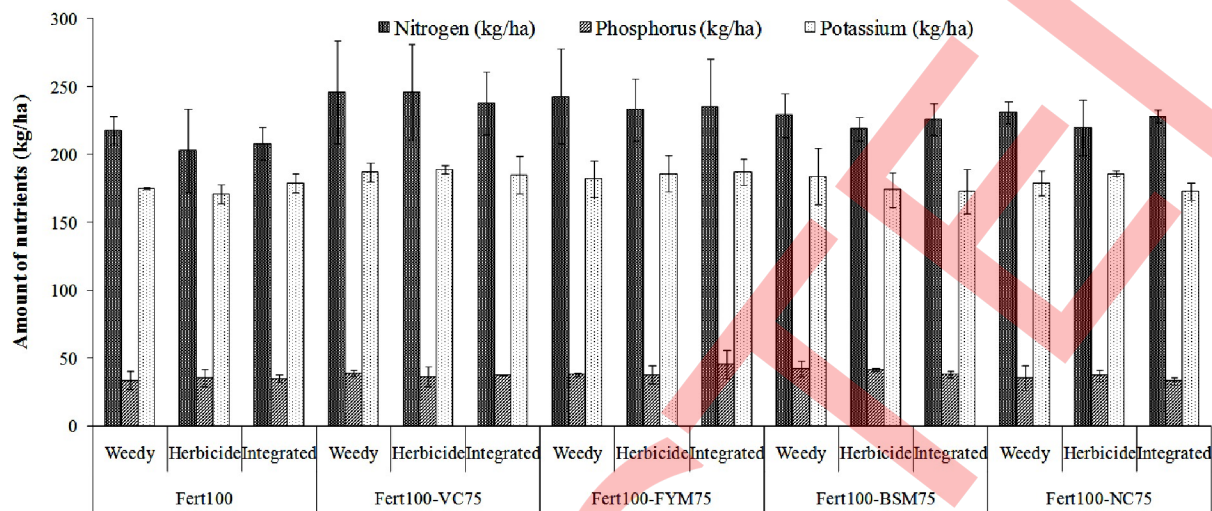

**Fig 2. Effect of fertilizer and weed treatment combinations on post-harvest soil macro-nutrient content.** N, nitrogen; P, phosphorus; K, potassium; VC, vermicompost; FYM, farmyard manure; BSM, brassicaceous seed meal; NC, neem cake; Fert<sub>100</sub>, full dose of N,P and K through fertilizer; Fert<sub>75</sub>-VC<sub>25</sub>, 75% of N and 100% of P and K through fertilizer with 25% N through VC; Fert<sub>75</sub>-FYM<sub>25</sub>, 75% of N and 100% of P and K through fertilizer with 25% N through FYM; Fert<sub>75</sub>-BSM<sub>25</sub>, 75% of N and 100% of P and K through fertilizer with 25% N through BSM; Fert<sub>75</sub>-NC<sub>25</sub>, 75% of N and 100% of P and K through fertilizer with 25% N through NC; Weedy, no weeding; herbicide, bispyribac-sodium 25 g/ha at 15 DAT *fb* metsulfuron-methyl + chlorimuron ethyl (2+2) g/ha at 30 DAT; integrated, bensulfuron methyl + pretilachlor (60+600) g/ha at 5 DAT *fb* MW at 30 DAT; DAT, days after transplanting.

<https://doi.org/10.1371/journal.pone.0262586.g002>

fertilized plots. The N availability in post-harvest soil was increased by 16, 13, 7 and 8% with nutrient supplementation through vermicompost, FYM, BSM and neem cake, respectively over chemical fertilizer. Among weed control measures, a slightly higher available N was observed in the no-weed plot in all nutrient management options. Compared to the chemical fertilized plot, the available P in post-harvest soils from plots fertilized with FYM or BSM were 16.6 and 17.3% higher, respectively. As with available N, slightly higher available K was also recorded with organic manure treatments ( $p \geq 0.05$ ). Supplementation with Vermicompost or FYM for nutrients increased the available K by 7 and 6% respectively over sole chemical fertilizer. Results indicated that integrated nutrient management with bulky organic manures (vermicompost and FYM) favored higher build-up of residual available macronutrients in post-harvest soil than concentrated organic manures like BSM and neem cake.

### 3.5 Economics

It was observed that the inclusion of organic manures was associated with the higher cost of cultivation in all integrated nutrient management treatments over the sole chemical approach. The maximum cost of cultivation was associated with N supplementation through neem cake, closely followed by BSM (Table 4). The net return was higher in integrated based treatments over the sole chemical approach except for the addition of neem cake. The maximum net return and economic efficiency were computed with N supplementation through BSM having an integrated weed management approach. However, the highest benefit to cost ratio was recorded for 25%N supplied by FYM, closely followed by BSM. Concerning the weed management approach, the inclusion of hoeing with pre-emergent herbicide resulted in a higher net return and benefit to cost ratio with maximum economic return than solely chemical-based weed management practice.

Table 4. Economics for rice production per hectare (two years' pooled data).

| Treatment combinations                       | Additional cost due to treatment (USD·ha <sup>-1</sup> ) | Gross return (USD·ha <sup>-1</sup> ) | Net return (USD·ha <sup>-1</sup> ) | B:C ratio | Economic efficiency (USD·day <sup>-1</sup> ·ha <sup>-1</sup> ) |
|----------------------------------------------|----------------------------------------------------------|--------------------------------------|------------------------------------|-----------|----------------------------------------------------------------|
| Fert <sub>100</sub> ×Weedy                   | 63                                                       | 1047                                 | 485                                | 1.86      | 5.27                                                           |
| ×Herbicide                                   | 117                                                      | 1186                                 | 570                                | 1.93      | 6.20                                                           |
| ×Integrated                                  | 178                                                      | 1282                                 | 605                                | 1.89      | 6.57                                                           |
| Fert <sub>75</sub> -VC <sub>25</sub> ×Weedy  | 83                                                       | 1054                                 | 472                                | 1.81      | 5.13                                                           |
| ×Herbicide                                   | 137                                                      | 1218                                 | 581                                | 1.91      | 6.31                                                           |
| ×Integrated                                  | 198                                                      | 1327                                 | 629                                | 1.90      | 6.84                                                           |
| Fert <sub>75</sub> -FYM <sub>25</sub> ×Weedy | 83                                                       | 1043                                 | 460                                | 1.79      | 5.00                                                           |
| ×Herbicide                                   | 137                                                      | 1256                                 | 620                                | 1.97      | 6.74                                                           |
| ×Integrated                                  | 198                                                      | 1432                                 | 734                                | 2.05      | 7.99                                                           |
| Fert <sub>75</sub> -BSM <sub>25</sub> ×Weedy | 129                                                      | 1162                                 | 534                                | 1.85      | 5.80                                                           |
| ×Herbicide                                   | 183                                                      | 1298                                 | 616                                | 1.90      | 6.69                                                           |
| ×Integrated                                  | 244                                                      | 1482                                 | 739                                | 1.99      | 8.03                                                           |
| Fert <sub>75</sub> -NC <sub>25</sub> ×Weedy  | 166                                                      | 1032                                 | 366                                | 1.55      | 3.99                                                           |
| ×Herbicide                                   | 220                                                      | 1226                                 | 507                                | 1.70      | 5.51                                                           |
| ×Integrated                                  | 281                                                      | 1386                                 | 605                                | 1.78      | 6.59                                                           |

N, nitrogen; P, phosphorus; K, potassium; VC, vermicompost; FYM, farmyard manure; BSM, brassicaceous seed meal; NC, neem cake; Fert<sub>100</sub>, full dose of N,P and K through fertilizer; Fert<sub>75</sub>-VC<sub>25</sub>, 75% of N and 100% of P and K through fertilizer with 25% N through VC; Fert<sub>75</sub>-FYM<sub>25</sub>, 75% of N and 100% of P and K through fertilizer with 25% N through FYM; Fert<sub>75</sub>-BSM<sub>25</sub>, 75% of N and 100% of P and K through fertilizer with 25% N through BSM; Fert<sub>75</sub>-NC<sub>25</sub>, 75% of N and 100% of P and K through fertilizer with 25% N through NC; Weedy, no weeding; Herbicide, bispyribac-sodium 25 g/ha at 15 DAT fb metsulfuron methyl + chlorimuron ethyl (2 +2) g/ha at 30 DAT; Integrated, bensulfuron methyl + pretilachlor (60+600) g/ha at 5 DAT fb MW at 30 DAT; DAT, days after transplanting; Within year, nutrient and weed management, numbers followed by different letter indicate significant differences at  $p \leq 0.05$  (otherwise statistically at par). ns, non-significant ( $p > 0.05$ ); \*, \*\* and \*\*\* indicate significant at  $p < 0.05$ , 0.01 and 0.001; Respectively cost of urea: 0.107 USD·kg<sup>-1</sup>; Single super phosphate (SSP): 0.114 USD·kg<sup>-1</sup>; muriate of potash (MOP): 0.257 USD·kg<sup>-1</sup>; Vermicompost(VC): 0.021 USD·kg<sup>-1</sup>; Farmyard manure (FYM): 0.009 USD·kg<sup>-1</sup>; Brassicaceous seed meal (BSM): 0.214 USD·kg<sup>-1</sup>; Neem cake (NC): 0.357 USD·kg<sup>-1</sup>; Labor wages @ 2.57 USD·man<sup>-1</sup> unit<sup>-1</sup>; Cost of Atrazine: 12.53 USD·kg<sup>-1</sup>; 1 USD (US dollar) D 70 Indian rupees.

<https://doi.org/10.1371/journal.pone.0262586.t004>

## 4. Discussion

In our study, the substitution of BSM and neem cake for 25% of the N requirement reduced mean weed density and dry weight at tillering and panicle initiation stage of rice. Application of concentrated organic manures before transplanting suppressed weed seed germination as reflected in lower weed density and dry weight. The suppression of weeds by the addition of organic manures might be explained by phototoxic allelochemicals released after the addition of concentrated organic manure which effectively inhibited germination of weed seeds or caused weed seed mortality [55–57]. *Brassica* residues contain glucosinolates and phenolic compounds which were converted into several isothiocyanates compounds through myrosinase activity that express allelopathic activity. These allelochemicals were potentially responsible for the reduction of weed growth in the paddy [58]. That the addition of organic N suppressed weed growth compared to inorganic treatments was earlier reported by Davis and Liebman [59]. Application of organic manures not only suppressed weed growth by releasing allelochemicals, but also by modifying N availability to weeds at the initial stages of their growth. The lower weed density and weed dry weight obtained in our study with added BSM and neem cake are in agreement with the above-mentioned studies. The source of supply of different nutrients, organic manure vs inorganic fertilizer, results from indifferent responses from weeds based on nutrient availability at initial crop growth stages. Some weed seeds may not be fully digested in the stomachs of cattle and the seeds can be excreted in the manure reflecting their viability and vigor in the crop fields after dispersal through organic manures

[60]. That application of FYM enhances weed growth was also observed by Efthimiadou et al. [61]. The observation that gradual release of N from compost and manure with time favors weed growth rather than crop productivity was also reported [62]. These studies explain the abundant weed growth seen with FYM and vermicompost treatments compared to chemical fertilizers.

Decreased weed growth with BSM and neem cake fertilization was caused by the lower nutrient uptake by weeds under these conditions which ultimately resulted in higher crop yield. The repeated addition of organic manure over years enhanced its efficacy in reducing weed growth and nutrient removal by weeds. Addition of organic matter to soil improved rice growth in terms of yield and yield attributes. Different integration of bulky and concentrated organic manures with chemical fertilizer increased the growth and yield of rice over sole chemical fertilization. The bacterial nitrification activities were inhibited under the waterlogged condition that prevents the ammonium volatilization and denitrification losses and creates a conducive environment for soil organic N mineralization, of which the end product is ammonium nitrogen [63, 64]. Thus, gradual mineralization of organic manures and split application of nutrients increases the availability of plant nutrients during critical rice growth stages for rapid tillering and panicle initiation, which contributes to higher grain yield. Higher rice grain yields under integrated practices were earlier reported by Mishra et al. [65]; Borah et al. [66]; Singh et al. [67]. In our study, maximum growth and yield of rice were achieved with the addition of BSM followed by FYM. The higher grain yields with N supplementation through organic manures are in agreement with results obtained by Sarkar et al. [68] who found that integrated use of FYM along with NPK fertilizers enhanced rice grain and straw yield. Recently, Mondal et al. [69] observed that 50% substitution of inorganic fertilizers with organic manure significantly enhanced hybrid rice yield and productivity in subtropical eastern India. Moe et al. [9] demonstrated that the substitution of 50% of the recommended dose of N with poultry manure and FYM can achieve a sustainable economic yield of hybrid rice in Myanmar.

Weeds are the major biotic constraints on a crop's production and cause a significant loss of yield. In general, weeds occur in repeated flushes in a field throughout the growth period of a crop. So, adopting a single method of weed control may not be sufficient to manage diverse weed species in a crop field. In the present study, the chemical weed management approach using bispyribac-Na followed by metsulfuron-methyl + chlorimuron-ethyl may not be able to control some weeds which appear in the later stages of crop growth. The use of hoeing following pre-emergence application of bensulfuron-methyl + pretilachlore effectively managed weed flora which were not controlled by herbicide application or which germinate after herbicide application. Ghosh et al. [48] found that integration of non-chemical weed management approaches along with herbicide enhanced the weed control efficiency as well as the yield of rice. Like integrated nutrient management, the combination of hoeing with herbicide increased mean grain yield by  $1.26 \text{ t ha}^{-1}$ , while herbicide use alone for weed management only increased mean grain yield by  $0.72 \text{ t ha}^{-1}$  compared to the non-weeded condition. Sarkar et al. [70] found that integration of hand weeding with pre-emergence herbicide use produced maximum yields compared to treatments with herbicide alone in transplanted winter rice in Bangladesh. This might be because the application of herbicide reduced weed growth at the initial crop growth stage, and later hoeing removed remaining weeds at the rapid tillering phase. Weed competition with the rice crop was eliminated at the critical growth stages, resulting in lower weed density, reduced nutrient loss from uptake by weeds, with higher nutrient uptake by crops and larger grain yield.

A higher level of nutrient uptake by rice grain and straw was observed on plots fertilized with FYM and BSM compared to others. Organic manures such as FYM and BSM decompose



gradually and release nutrients slowly over time. The addition of organic manures creates a better soil environment, more extensive root proliferation due to improvement in soil structure and enhances nutrient cycling by soil microbes [71]. Organic acids released during the decomposition process are good chelating agents for P and increase its availability from applied P fertilizers [72]. Nutrient supplementation from both organic and inorganic sources enriches nutrient content in both grain and straw [73–75]. However, in contrast to this general rule, neem cake treatment resulted in the lowest grain and straw N and P uptake observed. This may be due to the smaller amount of nutrients released from neem cake, especially N and P, from the panicle emergence period to the grain filling period and a slower mineralization rate compared to other organic manures. Apart from the C:N ratio, the chemical composition of the added organic matter is a crucial factor that governs the mineralization rate [76, 77]. The composition and molecular complexity of neem cake may delay the mineralization process and also affect nutrient release behavior. Mondal et al. [78] reported that neem cake addition results in a slower mineralization rate and lower availability of  $\text{NH}_4^+$  and  $\text{NO}_3^-$  during a 60 to 90 day period compared to *Brassica* cake in an incubation study. Furthermore, the lower amount of plant-available P during the 90 to 120 days observed in their study suggested that less P may have been available to our rice crop during the grain-filling period. The K uptake and content was higher in straw and lower in grain as measured after 100% NPK treatment. Higher inputs of N and P from fertilizer result in a soil solution that triggers indirect absorption of K by plants to compensate for imbalances due to higher N and P supplies [79–81]. That may cause over-consumption of K during the vegetative period with subsequent lower availability during the grain filling stage.

Two years of integrated nutrient management with vermicompost, FYM, BSM and neem cake have shown a positive but non-significant ( $p \geq 0.05$ ) impact on the build-up of soil organic carbon, available N, P and K content in post-harvest soil over sole chemical fertilizer. The main reason behind the non-significant variation of these soil parameters was most likely the relatively short duration of the experiment [82]. To draw sound conclusions on the effects of organic fertilizers on soil properties we would have to run longer experiments with organic manures added at lower concentrations. Organic manures added at high amounts can produce marked variations in soil properties within a short time. Organic manure applications in smaller quantities are beneficial in terms of enhancing soil microbe function, which is directly linked to nutrient cycling and transformations. Enrichment of soil with organic matter leads to increased cation exchange capacity, which enhances the soil's nutrient holding and buffering capacity [11, 83, 84]. The enrichment of soil fertility parameters was more prominent with bulky organic manures such as FYM and vermicompost. To supply the same amount of N (25% N), larger amounts of FYM and vermicompost are required compared to BSM and neem cake. Improvement in soil quality under long term application of compost was found with a maize-wheat cropping system in sub-mountainous inceptisol soils of western India [85]. After a two-year experiment on rice growing, Mondal et al. [69] reported that the application of 50% or more of the nutrient requirement from mustard oil cake and the remainder through NPK fertilizer brought about a significant increase in soil organic carbon and available N-P-K content over initial values in post-harvest soil. An increase in yield and better soil fertility with integrated nutrient management was also reported by Satyanarayana et al. [16]; Sarkar et al. [68] and Jha et al. [86].

## 5. Conclusions

We have tested the hypothesis that the integration of organic manure into nutrient and weed management approaches helps to cut down herbicide contamination in the environment with



greater weed control efficiency and higher crop yield. The two-year trial revealed that the integration of concentrated organic manures with chemical fertilizer effectively reduced weed growth and nutrient uptake and increased crop yield. In addition, organic fertilizer use had a positive impact on the buildup of soil organic carbon and the availability of soil nutrients compared to a purely chemical management approach. So, integration of nutrient and weed management practices in rice might be an effective strategy for sustainable and economic rice cultivation in eastern India. The potential benefits of organic fertilizers like brassicaceous seed meal and neem cake could be exploited for both nutrient and weed management and they could be an effective alternative for farmyard manure and vermicompost.

## Supporting information

**S1 Table. Nutrient content (%) in different organic manures.**  
(DOCX)

## Acknowledgments

The authors would like to thank Hon'ble Vice-Chancellor, Bidhan Chandra Krishi Viswavidyalaya for providing resources to complete the trials.

## Author Contributions

**Conceptualization:** Dibakar Ghosh, Koushik Brahmachari, Dibakar Roy, Anupam Das.

**Data curation:** Dibakar Ghosh, Sukamal Sarkar, Debojyoti Moulick, Akbar Hossain.

**Formal analysis:** Dibakar Ghosh, Sukamal Sarkar, Debojyoti Moulick, Akbar Hossain.

**Funding acquisition:** Milan Skalický, Marián Brestič, Vaclav Hejnak, Pavla Vachova, Mohamed M. Hassan.

**Investigation:** Dibakar Ghosh.

**Methodology:** Dibakar Ghosh, Koushik Brahmachari, Dibakar Roy, Anupam Das.

**Project administration:** Koushik Brahmachari.

**Resources:** Koushik Brahmachari.

**Software:** Sukamal Sarkar.

**Supervision:** Koushik Brahmachari, Akbar Hossain.

**Validation:** Dibakar Ghosh, Dibakar Roy.

**Visualization:** Dibakar Ghosh, Dibakar Roy.

**Writing – original draft:** Dibakar Ghosh, Dibakar Roy, Anupam Das, Sukamal Sarkar, Debojyoti Moulick.

**Writing – review & editing:** Koushik Brahmachari, Milan Skalický, Marián Brestič, Vaclav Hejnak, Pavla Vachova, Mohamed M. Hassan, Akbar Hossain.

## References

1. Mahajan G., Chauhan B. S., and Kumar V., Integrated weed management in rice. In Recent advances in weed management (pp. 125–153). Springer, New York, NY; 2014.
2. Dhekale B.S., et al., Prediction of kharif rice yield at Kharagpur using disaggregated extended range rainfall forecasts. *Theor. Appl Climatol*, 2018. 133(3–4): p. 1075–1091.

3. FAO Statistical Databases. Food and Agriculture Organization (FAO) of the United Nations, Rome, 2018. <http://www.fao.org>
4. Thiyagarajan T.M., and Gujja B. Single-seedling planting and the Gaja planting system. *SRI Newsletter*. (6), 2–13; 2009.
5. Lu C.C., and Tian H., Global nitrogen and phosphorus fertilizer use for agriculture production in the past half century: shifted hot spots and nutrient imbalance. *Earth Syst. Sci. Data*, 2017. 9: p.181.
6. Ladha J.K., et al., How extensive are yield declines in long-term rice–wheat experiments in Asia? *Field Crops Res*, 2003. 81: p. 159–180.
7. Qi D., Wu Q., and Zhu J., Nitrogen and phosphorus losses from paddy fields and the yield of rice with different water and nitrogen management practices. *Sci. Rep*, 2020. 10(1): p. 1–12. <https://doi.org/10.1038/s41598-019-56847-4> PMID: 31913322
8. Wang J., et al., Methane and nitrous oxide emissions as affected by organic–inorganic mixed fertilizer from a rice paddy in southeast China. *J. Soil. Sediment*, 2013. 13(8): p.1408–1417.
9. Moe K., et al., Effects of combined application of inorganic fertilizer and organic manures on nitrogen use and recovery efficiencies of hybrid rice (Palethwe-1). *Am. J. Plant Sci*, 2017. 8(05):p. 1043.
10. Gastal F., and Lemaire G., N uptake and distribution in crops: an agronomical and ecophysiological perspective. *J. Exp. Bot*, 2002; 53: p. 789–99. <https://doi.org/10.1093/jexbot/53.370.789> PMID: 11912222
11. Murphy B., Key soil functional properties affected by soil organic matter—evidence from published literature. In *IOP Conf. Series: Earth Env. Sci*, 2015. 25: p. 1–6.
12. Yadav R.L., et al., Rice-wheat cropping system: assessment of sustainability under green manuring and chemical fertilizer inputs. *Field Crop Res*, 2002. 65(1): 15–30.
13. Timsina J., and Connor D.J. Productivity and management of rice–wheat cropping systems: issues and challenges. *Field Crop. Res*, 2001. 69(2):p.93–132.
14. Khan A.R., et al., Integrated nutrient management for sustainable rice production. *Arch. Agron. Soil Sci*, 2004. 50(2): p. 161–165.
15. Srinivasarao C., et al., Sustainable management of soils of dryland ecosystems of India for enhancing agronomic productivity and sequestering carbon. *Adv. Agron*, 2013. 121:p. 253–329.
16. Satyanarayana V., Influence of integrated use of farmyard manure and inorganic fertilizers on yield and yield components of irrigated lowland rice. *J. Plant Nutr*, 2002. 25(10): p. 2081–2090.
17. Saha P.K., et al., Long-term integrated nutrient management for rice-based cropping pattern: effect on growth, yield, nutrient uptake, nutrient balance sheet, and soil fertility. *Commun. Soil Sci. Pl. Anal*, 2007. 38(5–6): p. 579–610.
18. Chaudhary M., and Narwal R.P., Effect of long-term application of farmyard manure on soil micronutrient status. *Arch. Agron. Soil Sci*, 51(3): p. 351–359.
19. Tadesse T., Effects of farmyard manure and inorganic fertilizer application on soil physico-chemical properties and nutrient balance in rain-fed lowland rice ecosystem. *Am. J. Plant Sci*, 2013. 4: p. 309–316.
20. Majumder B., et al., Soil organic carbon pools and productivity relationships for a 34 year old rice–wheat–jute agroecosystem under different fertilizer treatments. *Plant Soil*, 2007. 297(1–2): p. 53–67.
21. Bandyopadhyay P.K., et al., Effect of organic inputs on aggregate associated organic carbon concentration under long-term rice–wheat cropping system. *Geoderma*, 2010. 154(3–4): p. 379–386.
22. Padbhushan R., Rakshit R., Das A. and Sharma R.P., Assessment of long-term organic matter amendments effect on some sensitive indicators of carbon under subtropical climatic condition. *The Bioscan*, 2015. 10: 1237–1240.
23. Chaudhury J., et al., Assessing soil quality under long-term rice-based cropping system. *Commun. Soil Sci. Plan*, 2005. 36(9–10): p. 1141–1161.
24. Rakshit R., Das A., Padbhushan R., Sharma R.P., Sushant. and Kumar, S., Assessment of soil quality and identification of parameters influencing system yield under long term fertilizer trial. *Journal of the Indian society of Soil Science*, 66(2): 166–171.
25. Biswas S., Establishment of critical limits of indicators and indices of soil quality in rice-rice cropping systems under different soil orders. *Geoderma*, 2017. 292: p. 34–48.
26. Geng Y., et al., Effects of equal chemical fertilizer substitutions with organic manure on yield, dry matter, and nitrogen uptake of spring maize and soil nitrogen distribution. *PloS One*, 2019, 14(7): e0219512. <https://doi.org/10.1371/journal.pone.0219512> PMID: 31287845
27. Bejbaruha R., Sharma R. C., and Banik P., Direct and residual effect of organic and inorganic sources of nutrients on rice-based cropping systems in the sub-humid tropics of India. *J. Sustain. Agri*, 2009. 33(6): p. 674–689.

28. Paul J., Bioresource nutrient recycling and its relationship with biofertility indicators of soil health and nutrient dynamics in rice-wheat cropping system. *Commun. Soil Sci. Pl. Anal.* 2014. 45 (7): p. 912–924.
29. Ghosh D., Weed management through herbicide application in direct-seeded rice and yield modeling by artificial neural network. *Span. J. Agric. Res.*, 2016. 14 (2): e1003, 10 pages. <http://dx.doi.org/10.5424/sjar/2016142-8773>
30. Tang L., et al., Effect of fertilization patterns on the assemblage of weed communities in an upland winter wheat field. *J. Plant Ecol.*, 2013. 7(1): p. 39–50.
31. Banerjee H., et al., Efficacy of herbicides against canary grass and wild oat in wheat and their residual effects on succeeding greengram in coastal Bengal. *Indian J. Weed Sci.*, 2019. 51(3): p. 246–251.
32. Kundu R., et al., Efficacy of herbicides on weed control, rhizospheric micro-organisms, soil properties and leaf qualities in tea plantation. *Indian J. Weed Sci.*, 2020. 52(2): p. 160–168.
33. Milberg P. and Hallgren E., Yield loss due to weeds in cereals and its large scale variability in Sweden. *Field Crop. Res.*, 2004. 86: 199–209.
34. Mahajan G., Chauhan B.S., and Johnson D.E., Weed management in aerobic rice in Northwestern Indo-Gangetic Plains. *J. Crop Im.*, 2009. 23(4): p. 366–382.
35. O'Donovan J.T., Mandrew D.W., and Thomas A.G., Tillage and nitrogen influence weed population dynamics in barley. *Weed Tech.* 1997. 11: p. 502–509.
36. Ghosh D., et al., An integrated approach to weed management practices in direct-seeded rice under zero-tilled rice-wheat cropping system. *Int. J. Pest. Manag.*, 2017a. 63: p. 37–46, <https://doi.org/10.1080/09670874.2016.1213460>
37. Kumar M., Ghosh D., and Singh R., Effect of crop establishment and weed management practices on growth and yield of wheat. *Indian J. Weed Sci.*, 2018. 50: p. 129–132.
38. Ghosh D., Singh R., and Chander S., Effect of nitrogen fertilizer and weed management practices on weed growth and crop yield of zero-till transplanted rice. *Indian J. Weed Sci.*, 2018. 50: p. 287–289.
39. Ghosh D., et al., Nutrients Supplementation through Organic Manures Influence the Growth of Weeds and Maize Productivity. *Molecules*. 2020a, 25: p. 4924; <https://doi.org/10.3390/molecules25214924> PMID: 33114440
40. Singh R., Weed control in sesame with pre-emergence herbicides. *Indian J. Weed Sci.*, 2018. 50: p. 91–93. <https://doi.org/10.5958/0974-8164.2018.00022.9>
41. Gharde Y., et al., Fitting dose-response curve to identify herbicide efficacy and ED50 value in mixture. *Indian J. Weed Sci.*, 2017. 49: p. 165–169. <https://doi.org/10.5958/0974-8164.2017.00042.9>
42. Kumar A., et al., Integrated weed management in lentil (*Lens culinaris*) in calcareous alluvial soils of Bihar. *Indian J. Agron.*, 2016. 61: p. 75–78.
43. Arias-Estevéz M., et al., The mobility and degradation of pesticides in soils and the pollution of ground-water resources. *Agric. Ecosyst. Environ.*, 2008. 123: p. 247–260.
44. Magne C., Saladin G., and Clement C., Transient effect of the herbicide flazasulfuron on carbohydrate physiology in *Vitis vinifera* L. *Chemosphere*, 2006. 62: p. 650–657. <https://doi.org/10.1016/j.chemosphere.2005.04.119> PMID: 15987652
45. Boily M., Acetylcholinesterase in honey bees (*Apis mellifera*) exposed to neonicotinoids, atrazine and glyphosate: laboratory and field experiments. *Environ. Sci. Pollut. Res.*, 2013. 20(8): p. 5603–5614. <https://doi.org/10.1007/s11356-013-1568-2>
46. Meulen A.V.D., and Chauhan B.S., A review of weed management in wheat using crop competition. *Crop Prot.*, 2017. 95: p. 38–44.
47. Ghosh D., Integrated weed and nutrient management improve yield, nutrient uptake and economics of maize in the rice-maize cropping system of Eastern India. *Agronomy*, 2020b. 10: p. 1906 <https://doi.org/10.3390/agronomy10121906>
48. Ghosh D., et al., Impact of burial and flooding depths on Indian weedy rice. *Crop Prot.*, 2017b. 10: p. 106–110.
49. Hunt R., *Plant Growth Analysis Studies in Biology*. Edward Arnold: London, UK, 96: p. 26–38; 1978.
50. Watson D.J., and Watson M.A., Comparative physiological studies on the growth of field crops. *Ann. Appl. Biol.*, 1953. 40: p. 1–37, <https://doi.org/10.1111/j.1744-7348.1953.tb02364.x>
51. Jackson M.L., *Soil Chemical Analysis*. Prentice Hall of India Pvt. Ltd., New Delhi, pp. 183–347 and 387–408; 1978.
52. Walkley A., and Black I.A. An examination of the Deggareff method for determining soil organic matter and a proposed modification of the chronic acid titration method. *Soil Sci.*, 2014. 37: p. 29–38.
53. Subbiah B., and Asija G.L., A rapid procedure for the estimation of available nitrogen in soils. *Curr. Sci.*, 1956. 25: p. 259–260.

54. Olsen S.R., et al., Estimation of available phosphorus in phosphorus in soils by extraction with sodium bicarbonate. Circular 393. Washington, DC: United States Department of Agriculture; 1954.
55. Haramoto E. R., and Gallandt E. R., Brassica cover cropping: I. Effects on weed and crop establishment. *Weed Sci*, 2005. 53: p. 695–701.
56. Ashrafi Z.Y., et al., Study of bioassay the allelopathical effect of Neem (*Azadirachta indica*) n-hexane, acetone and water-soluble extracts on six weeds. *Int. J. Biol*, 2009. 1(1): p.71. <https://doi.org/10.5539/ijb.v1n1p71>
57. Hoagland L., Role of native soil biology in Brassicaceous seed meal-induced weed suppression. *Soil Biol. Biochem*, 2008. 40(7): p. 1689–1697.
58. Jabran K. 2017. Brassicaceae allelopathy for weed control. In: Jabran K., *Manipulation of Allelopathic Crops for Weed Control*. SpringerBriefs in Plant Science, Springer International Publishing AG, Switzerland. pp. 21–27.
59. Davis A.S., and Liebman M., Nitrogen source influences wild mustard growth and competitive effect on sweet corn. *Weed Sci*, 2001. 49: p. 58–566.
60. Dastgheib F., Relative importance of crop seed, manure and irrigation water as sources of weed infestation. *Weed Res*, 1989. 29(2): p. 113–116.
61. Efthimiadou A., et al., Effects of organic and inorganic amendments on weed management in sweet maize. *Int. J. Plant Prod*, 2012. 6(3): p. 291–308.
62. Blackshaw R.E., Molnar L.J., and Larney F.J., Fertilizer, manure and compost effects on weed growth and competition in western Canada. *Crop. Prot*, 2005. 24: p. 971–980.
63. Li S, Ai S, He H., Soil's nitrogen mineralization processes under continuously waterlogged incubation conditions. *Acta Univ Agric Boreali-occidentalis Sin*. 1999; 27: 1–5.
64. Zhang Y, Xu W, Duan P, Cong Y, An T, Yu N, et al., Evaluation and simulation of nitrogen mineralization of paddy soils in Mollisols area of Northeast China under waterlogged incubation. *PLoS ONE*, 2017. 12(2): e0171022. <https://doi.org/10.1371/journal.pone.0171022> PMID: 28170409
65. Mishra P.K., et al., Effect of integrated nitrogen nourishment and growth regulators on yield attributes and grain yield of hybrid rice. *Ann. Agric Res. New Series*, 2003. 24: p.411–415.
66. Borah D., Ghosh M., and Ghosh D. C., Effect of nutrient management practices on weed infestation, crop productivity and economics of rainfed upland rice (*Oryza sativa* L.) in Arunachal Pradesh. *Int. J. Bio-res. Env. Agril. Sci*, 2015. 1(3): p. 77–83.
67. Singh Y.V., Singh K.K., and Sharma S.K., Influence of crop nutrition and rice varieties under two systems of cultivation on grain quality, yield and water use. *Rice Sci*, 2012. 20(2): p.129–138.
68. Sarkar S., Das D. K., and Dolui A. K., Effect of Integrated Nutrient Management on Soil Fertility and Yield of Rice (*Oryza sativa* L.) under the System of Rice Intensification in the Indian Subtropics. *Commun. Soil Sci. Pl. Anal*, 2016. 47(18): p. 2053–2058.
69. Mondal S., et al., Influence of integrated nutrient management (INM) on nutrient use efficiency, soil fertility and productivity of hybrid rice. *Arch. Agron. Soil Sci*, 2016. 62(11), 1521–1529.
70. Sarkar M.A.R., Paul S.K., and Paul U., Effect of water and weed management in Boro rice (cv. BRRI dhan28) in Bangladesh. *Arch. Agr. Env. Sci*, 2017. 2(4): p. 325–329.
71. Fageria N.K., Role of soil organic matter in maintaining sustainability of cropping systems. *Commun. Soil Sci. Plant*, 2012. 43(16): p. 2063–2113.
72. Yu W., et al., Effects of organic-matter application on phosphorus adsorption of three soil parent materials. *J. Soil Sci. Plant Nutr*, 2013. 13(4): p.1003–1017.
73. Mishra V.K., and Sharma R.B., Effect of fertilizer alone and in combination with manures on physical properties and productivity of Entisol under rice-based cropping systems. *J. Indian Soc. Soil Sci*. 1997. 41: p. 84–88.
74. Singh C. V., Integrated weed and fertilizer management for sustainable weed control and improved productivity of upland rice. *Arch. Agron. Soil Sci*, 2008. 54(2): p.203–214.
75. Ahmed S., et al., Effect of integrated nutrient management on yield, nutrient uptake and soil fertility in autumn rice in an inceptisol of Assam. *Ann. Plant Soil Res*, 2014, 16(3): p. 192–197.
76. Varade P.A., and Patil M.N. Effect of Sodium Salts in Association with Organic Manures on Nitrification in a Vertisol. *J. Indian Soc. Soil Sci*, 1982. 30(1): p. 97–98.
77. Mohanty M., et al., How important is the quality of organic amendments in relation to mineral N availability in soils? *Agr. Res*, 2013. 2(2): p. 99–110.
78. Mondal S., Das R., and Das A.C., A comparative study on the decomposition of edible and non-edible oil cakes in the Gangetic alluvial soil of West Bengal. *Environ. Monit. Assess*, 2014. 186(8): p. 5199–5207. <https://doi.org/10.1007/s10661-014-3769-7> PMID: 24733437

79. Dobermann A., Cruz P.C.S., and Cassman K.G., Fertilizer inputs, nutrient balance, and soil nutrient-supplying power in intensive, irrigated rice systems. I. Potassium uptake and K balance. *Nutr. Cycling Agroecosyst*, 1996. 46: p.1–10. <https://doi.org/10.1007/BF00210219>
80. Pathak H., et al., Modelling the quantitative evaluation of soil nutrient supply, nutrient use efficiency, and fertilizer requirements of wheat in India. *Nutr. Cycling Agroecosyst*.2003. 65:p. 105–113. <https://doi.org/10.1023/A:1022177231332>
81. Römheld V., and Kirkby E.A., Research on potassium in agriculture: Needs and prospects. *Plant Soil*,2010. 335: p.155–180. <https://doi.org/10.1007/s11104-010-0520-1>
82. Walsh E., and McDonnell K.P., The influence of added organic matter on soil physical, chemical, and biological properties: a small-scale and short-time experiment using straw. *Arch. Agron. Soil Sci*, 2012. 58: p.S201–S205.
83. Hallsworth E.G., and Wilkinson G.K., The contribution of clay and organic matter to the cation exchange capacity of the soil. *J. Agric. Sci*, 1958. 51(1): p. 1–3.
84. Oades J.M., The role of biology in the formation, stabilization and degradation of soil structure. In *Soil Structure/soil biota interrelationships*. *Geoderma*,1993. 56: p. 377–400.
85. Sharma K.L., et al., Combined effect of tillage and organic fertilization on soil quality key indicators and indices in alluvial soils of Indo-Gangetic Plains under rainfed maize–wheat system. *Arch. Agron. Soil Sci*, 2015. 61(3): p. 313–327.
86. Jha M. N., Chaurasia S. K., and Bharti R. C. Effect of integrated nutrient management on rice yield, soil nutrient profile, and cyanobacterial nitrogenase activity under rice–wheat cropping system. *Commun. Soil Sci. Plant*, 2013. 44(13): p. 1961–1975.
